# Supplementary material for: Templated synthesis of atomically thin platy hematite nanoparticles within a layered silicate exhibiting efficient photocatalytic activity
Source: Royal Society of Chemistry journal article supplement (doi:10.1039/c7ta10427h), 2018-01-01
Supplement: c7ta10427h1.pdf [file c7ta10427h1.pdf]

### Electronic Supplementary Information (ESI)

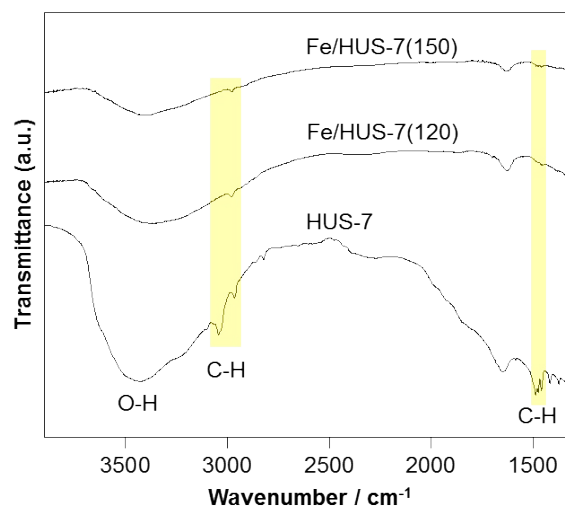

**Fig. S1.** FT-IR spectra of different samples.

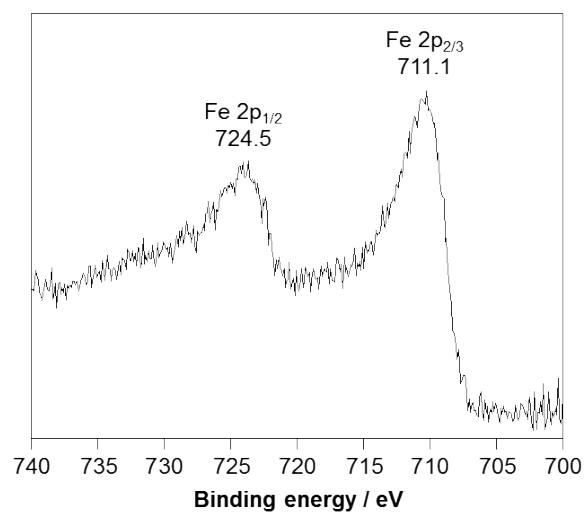

**Fig. S2.** XPS spectrum of Fe/HUS-7(120).

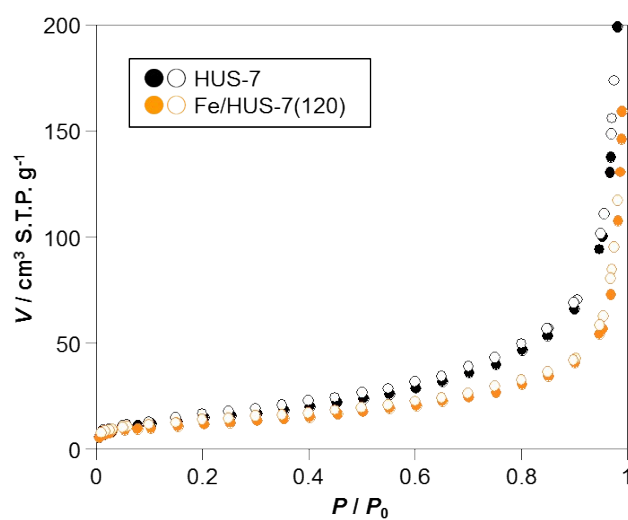

**Fig. S3.** N<sub>2</sub> adsorption (filled)/desorption(open) isotherms of HUS-7 and Fe/HUS-7(120). Prior to the measurements, the samples were evacuated at 80 °C for 12 h.
